# Supplementary material for: The effect of gender stereotypes on young girls’ intuitive number sense
Source: PLOS journal article supplement (doi:10.1371/journal.pone.0258886), 2021-10-28
Supplement: S3 (10.1371/journal.pone.0258886.s003) [file journal.pone.0258886.s003]

**S2 Table. Means and standard deviations for math-gender beliefs and ANS accuracy.**

|                                      | Mean  | Standard Deviation |
|--------------------------------------|-------|--------------------|
| Math-Own Gender Beliefs <sup>a</sup> | 1.20  | 0.42               |
| Girls                                | 1.20  | 0.39               |
| Boys                                 | 1.20  | 0.47               |
| Math                                 | 1.20  | 0.41               |
| Control                              | 1.21  | 0.43               |
| Girls/Math                           | 1.18  | 0.39               |
| Girls/Control                        | 1.23  | 0.40               |
| Boys/Math                            | 1.22  | 0.45               |
| Boys/Control                         | 1.18  | 0.49               |
| ANS Accuracy <sup>b</sup>            | 80.61 | 11.41              |
| Girls                                | 82.29 | 10.93              |
| Boys                                 | 77.44 | 11.63              |
| Math                                 | 81.15 | 11.18              |
| Control                              | 80.08 | 11.62              |
| Girls/Math                           | 81.49 | 11.23              |
| Girls/Control                        | 83.11 | 10.58              |
| Boys/Math                            | 77.40 | 11.93              |
| Boys/Control                         | 77.47 | 11.38              |

<sup>a</sup>Range from 0 to 2, with higher numbers indicating a stronger association between one's own gender and math.

<sup>b</sup>ANS performance is a percentage of correct trials.
